# Supplementary material for: Engineered Glucose Oxidase Capable of Quasi-Direct Electron Transfer after a Quick-and-Easy Modification with a Mediator
Source: PubMed Central journal article supplement (PMC7036908; doi:10.3390/ijms21031137), 2020-02-08
Supplement: ijms-21-01137-s001.pdf [file ijms-21-01137-s001.pdf]

## Supplementary Materials

# Engineered Glucose Oxidase Capable of Quasi-Direct Electron Transfer after Quick-and-Easy Modification with a Mediator

Nanami Suzuki <sup>1,†</sup>, Jinhee Lee <sup>2,†</sup>, Noya Loew <sup>2</sup>, Yuka Takahashi-Inose <sup>3</sup>, Junko Okuda-Shimazaki <sup>2</sup>, Katsuhiko Kojima <sup>3</sup>, Kazushige Mori <sup>3</sup>, Wakako Tsugawa <sup>1</sup> and Koji Sode <sup>2,\*</sup>

<sup>1</sup> Department of Biotechnology and Life Science, Graduate School of Engineering, Tokyo University of Agriculture and Technology, 2-24-16 Naka-cho, Koganei, Tokyo, 184-8588, Japan; nsuzuki@protonmail.com (N.S.); tsugawa@cc.tuat.ac.jp (W.T.)

<sup>2</sup> Joint Department of Biomedical Engineering, The University of North Carolina at Chapel Hill and North Carolina State University, Chapel Hill, NC 27599, USA; jh.lee@unc.edu (J.L.); noya-loew@rs.tus.ac.jp (N.L.); jokudas@email.unc.edu (J.O.-S.); ksode@email.unc.edu (K.S.)

<sup>3</sup> Ultizyme International Ltd., 3-9-5. Taihei, Sumida, Tokyo, 130-0012, Japan; yukappe1122@gmail.com (Y.T.-I.); katsuhiko.kojima@gmail.com (K.K.); mori\_ka1213@yahoo.co.jp (K.M.)

\* Correspondence: ksode@email.unc.edu; Tel.: +1-919-966-3550

† These authors contributed equally to this work.

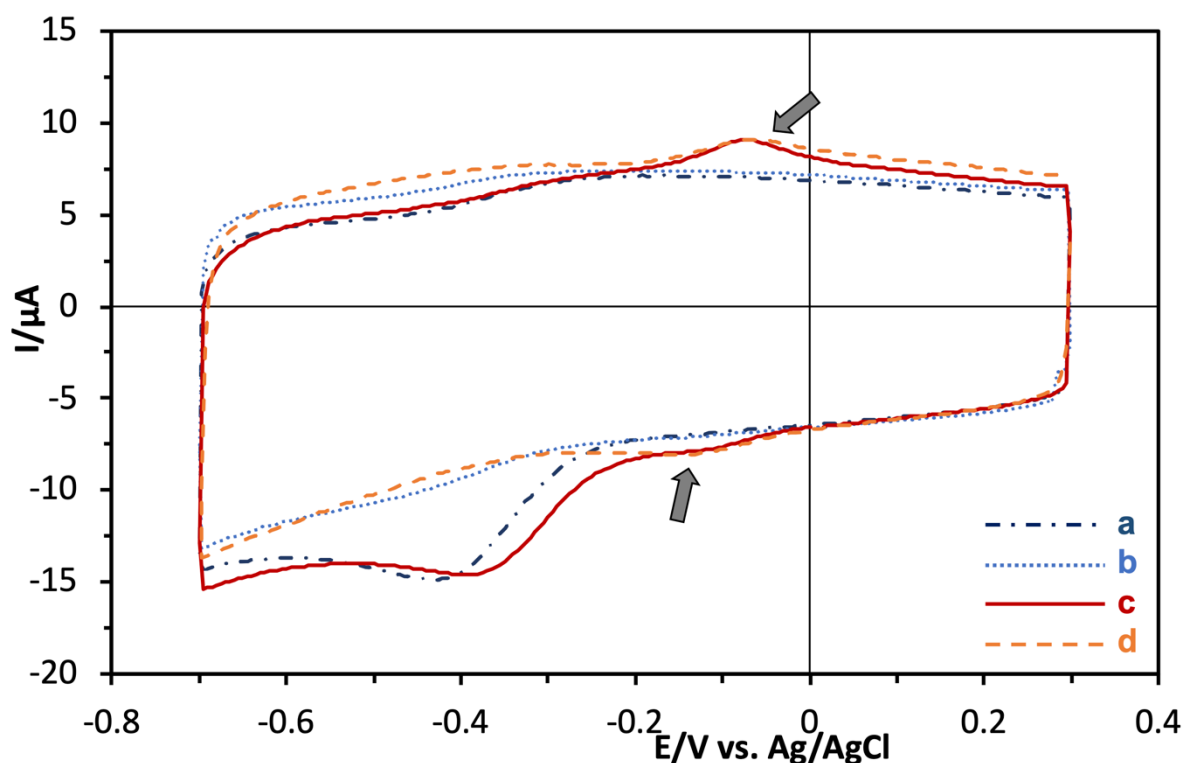

**Figure S1.** Cyclic voltammograms of (a) unmodified AnGOx-WT in the absence of glucose; (b) unmodified AnGOx-WT in presence of 33 mM glucose; (c) PES-modified AnGOx-WT in absence of glucose; (d) PES-modified AnGOx-WT in presence of 33 mM glucose. Scan rate 50 mV/s. Arrows: peaks due to PES.

**Table S1.** Kinetic parameters of AnGOx-WT and AnGOx-I489K

| Enzyme                  | PES<br>modification | Oxidase Activity     |               |                             | Dehydrogenase Activity |               |                             |
|-------------------------|---------------------|----------------------|---------------|-----------------------------|------------------------|---------------|-----------------------------|
|                         |                     | $V_{\max}$<br>(U/mg) | $K_m$<br>(mM) | $V_{\max}/K_m$<br>(U/mg·mM) | $V_{\max}$<br>(U/mg)   | $K_m$<br>(mM) | $V_{\max}/K_m$<br>(U/mg·mM) |
| <i>AnGOx</i> -<br>WT    | -                   | 140                  | 36            | 3.8                         | 50                     | 32            | 1.6                         |
|                         | +                   | 170                  | 40            | 4.3                         | 53                     | 26            | 2                           |
| <i>AnGOx</i> -<br>I489K | -                   | 76                   | 28            | 2.7                         | 22                     | 22            | 1                           |
|                         | +                   | 130                  | 42            | 3                           | 49                     | 23            | 2.2                         |

Oxidase activity was determined by monitoring the increase of absorbance at 555 nm (formation of quinoneimine dye) of a mixture of GOx, glucose (var. concentrations), 1.5 mM 4-aminoantipyrine (FUJIFILM Wako Pure Chemical Corporation, Osaka, Japan), 1.5 mM *N*-ethyl-*N*-(2-hydroxy-3-sulfopropyl)-3-methylaniline (Dojindo Laboratories Co. Ltd., Kumamoto, Japan), and 2 U/mL horseradish peroxidase (HRP) (Amano enzyme Inc., Gifu, Japan) in 20 mM P.P.B.. Quinoneimine dye is formed by HRP in presence of hydrogen peroxide. The formation of 1  $\mu\text{mol}/\text{min}$  hydrogen peroxide, corresponding to the oxidation of 1  $\mu\text{mol}/\text{min}$  glucose, was defined as 1 U oxidase activity.

Dehydrogenase activity was determined by monitoring the decrease of absorbance at 600 nm (reduction of 2,6-dichlorophenolindophenol, DCIP (Kanto Chemical Co. Inc., Tokyo, Japan)) of a mixture of GOx, glucose (var. concentrations), 0.6 mM PMS, and 0.06 mM DCIP in 20 mM P.P.B. The reduction of 1  $\mu\text{mol}/\text{min}$  DCIP, corresponding to the oxidation of 1  $\mu\text{mol}/\text{min}$  glucose, was defined as 1 U dehydrogenase activity.
